# Supplementary material for: The Association between Mutational Signatures and Clinical Outcomes among Patients with Early-Onset Breast Cancer
Source: MDPI journal article supplement (doi:10.3390/genes15050592), 2024-05-07
Supplement: s1 [file s1]

## **SUPPLEMENTAL FILE**

### **LIST OF TABLES OF FIGURES**

Table S1. The mean relative contribution and proportion of fitted COSMIC single-base substitution mutational signatures in the overall study sample.

Table S2. The mean relative contribution and proportion of fitted COSMIC insertion-deletion mutational signatures in the overall study sample.

Figure S1. Plot of the relative contribution of extracted *de novo* single-base substitution mutational signatures in each sample.

Figure S2. Plot of the relative contribution of extracted *de novo* insertion-deletion mutational signatures in each sample.

Figure S3. Plot of the relative contribution of fitted COSMIC single-base substitution mutational signatures in each sample.

Figure S4. Plot of the relative contribution of fitted COSMIC insertion-deletion mutational signatures in each sample.

Table S1. The mean relative contribution and counts of fitted COSMIC single-base substitution mutational signatures in the overall study sample.

| Signature | Absent | Present <sup>a</sup> | Relative contribution* |                    |
|-----------|--------|----------------------|------------------------|--------------------|
|           |        |                      | Mean                   | Standard deviation |
| SBS1      | 97     | 3                    | 0.003314109            | 0.020484192        |
| SBS2      | 84     | 16                   | 0.012650149            | 0.035955869        |
| SBS3      | 97     | 3                    | 0.005267358            | 0.030410316        |
| SBS4      | 98     | 2                    | 0.001974985            | 0.014585579        |
| SBS5      | 95     | 5                    | 0.013121055            | 0.064628252        |
| SBS6      | 94     | 6                    | 0.006827635            | 0.029423721        |
| SBS7a     | 100    | 0                    | 0                      | 0                  |
| SBS7b     | 99     | 1                    | 0.000455854            | 0.004558537        |
| SBS7c     | 100    | 0                    | 0                      | 0                  |
| SBS7d     | 100    | 0                    | 0                      | 0                  |
| SBS8      | 100    | 0                    | 0                      | 0                  |
| SBS9      | 98     | 2                    | 0.002178937            | 0.017504073        |
| SBS10a    | 100    | 0                    | 0                      | 0                  |
| SBS10b    | 95     | 5                    | 0.002700745            | 0.013329969        |
| SBS10c    | 100    | 0                    | 0                      | 0                  |
| SBS10d    | 100    | 0                    | 0                      | 0                  |
| SBS11     | 100    | 0                    | 0                      | 0                  |
| SBS12     | 99     | 1                    | 0.000497408            | 0.004974084        |
| SBS13     | 85     | 15                   | 0.01580875             | 0.048890527        |
| SBS14     | 100    | 0                    | 0                      | 0                  |
| SBS15     | 9      | 91                   | 0.12805659             | 0.063021744        |
| SBS16     | 100    | 0                    | 0                      | 0                  |
| SBS17a    | 84     | 16                   | 0.006707185            | 0.015786962        |
| SBS17b    | 100    | 0                    | 0                      | 0                  |
| SBS18     | 40     | 60                   | 0.08146849             | 0.082422608        |
| SBS19     | 99     | 1                    | 0.001316283            | 0.013162825        |
| SBS20     | 94     | 6                    | 0.00417017             | 0.016857751        |
| SBS21     | 100    | 0                    | 0                      | 0                  |
| SBS22     | 100    | 0                    | 0                      | 0                  |
| SBS23     | 98     | 2                    | 0.001405123            | 0.009999708        |
| SBS24     | 11     | 89                   | 0.202178023            | 0.117142943        |
| SBS25     | 99     | 1                    | 0.001027989            | 0.010279894        |
| SBS26     | 65     | 35                   | 0.040848974            | 0.061630382        |
| SBS28     | 100    | 0                    | 0                      | 0                  |
| SBS29     | 75     | 25                   | 0.038918736            | 0.078531388        |
| SBS30     | 99     | 1                    | 0.000560875            | 0.005608748        |

|       |     |    |             |             |
|-------|-----|----|-------------|-------------|
| SBS31 | 100 | 0  | 0           | 0           |
| SBS32 | 100 | 0  | 0           | 0           |
| SBS33 | 96  | 4  | 0.001534403 | 0.007621185 |
| SBS34 | 100 | 0  | 0           | 0           |
| SBS35 | 100 | 0  | 0           | 0           |
| SBS36 | 99  | 1  | 0.000752531 | 0.007525312 |
| SBS37 | 33  | 67 | 0.114497099 | 0.091815995 |
| SBS38 | 91  | 9  | 0.004948182 | 0.016370802 |
| SBS39 | 72  | 28 | 0.033865854 | 0.06230237  |
| SBS40 | 99  | 1  | 0.00217212  | 0.021721204 |
| SBS41 | 100 | 0  | 0           | 0           |
| SBS42 | 24  | 76 | 0.14541753  | 0.114457707 |
| SBS44 | 100 | 0  | 0           | 0           |
| SBS84 | 99  | 1  | 0.000854588 | 0.00854588  |
| SBS85 | 100 | 0  | 0           | 0           |
| SBS86 | 100 | 0  | 0           | 0           |
| SBS87 | 23  | 77 | 0.077587249 | 0.05241288  |
| SBS88 | 100 | 0  | 0           | 0           |
| SBS89 | 79  | 21 | 0.033454472 | 0.07655681  |
| SBS90 | 100 | 0  | 0           | 0           |
| SBS91 | 81  | 19 | 0.011004319 | 0.026860473 |
| SBS92 | 100 | 0  | 0           | 0           |
| SBS93 | 100 | 0  | 0           | 0           |
| SBS94 | 98  | 2  | 0.00245623  | 0.017372932 |

\*Relative contribution is expressed as a proportion between 0 and 1.

<sup>a</sup>Present means signature has absolute contribution greater than 0.

Table S2. The mean relative contribution and counts of fitted COSMIC insertion-deletion mutational signatures in the overall study sample.

| Signature | Absent | Present <sup>a</sup> | Relative contribution* |                    |
|-----------|--------|----------------------|------------------------|--------------------|
|           |        |                      | Mean                   | Standard deviation |
| ID1       | 67     | 33                   | 0.022991837            | 0.03993133         |
| ID2       | 37     | 63                   | 0.045069193            | 0.05069426         |
| ID3       | 85     | 15                   | 0.020575552            | 0.05608897         |
| ID4       | 50     | 50                   | 0.06268373             | 0.07775451         |
| ID5       | 93     | 7                    | 0.010339185            | 0.03976018         |
| ID6       | 53     | 47                   | 0.090744371            | 0.13145529         |
| ID7       | 84     | 16                   | 0.014201936            | 0.03567362         |
| ID8       | 59     | 41                   | 0.066143241            | 0.09989677         |
| ID9       | 96     | 4                    | 0.00321063             | 0.01610203         |
| ID10      | 60     | 40                   | 0.058290291            | 0.08238785         |
| ID11      | 81     | 19                   | 0.019559304            | 0.04493681         |
| ID12      | 2      | 98                   | 0.500130522            | 0.20391816         |
| ID13      | 85     | 15                   | 0.011329714            | 0.03269677         |
| ID14      | 84     | 16                   | 0.012909992            | 0.03171142         |
| ID15      | 96     | 4                    | 0.004832203            | 0.02582451         |
| ID16      | 71     | 29                   | 0.027648472            | 0.0494149          |
| ID17      | 77     | 23                   | 0.026126032            | 0.05682638         |
| ID18      | 99     | 1                    | 0.003213796            | 0.03213796         |

\*Relative contribution is expressed as a proportion between 0 and 1.

<sup>a</sup>Present means signature has absolute contribution greater than 0.

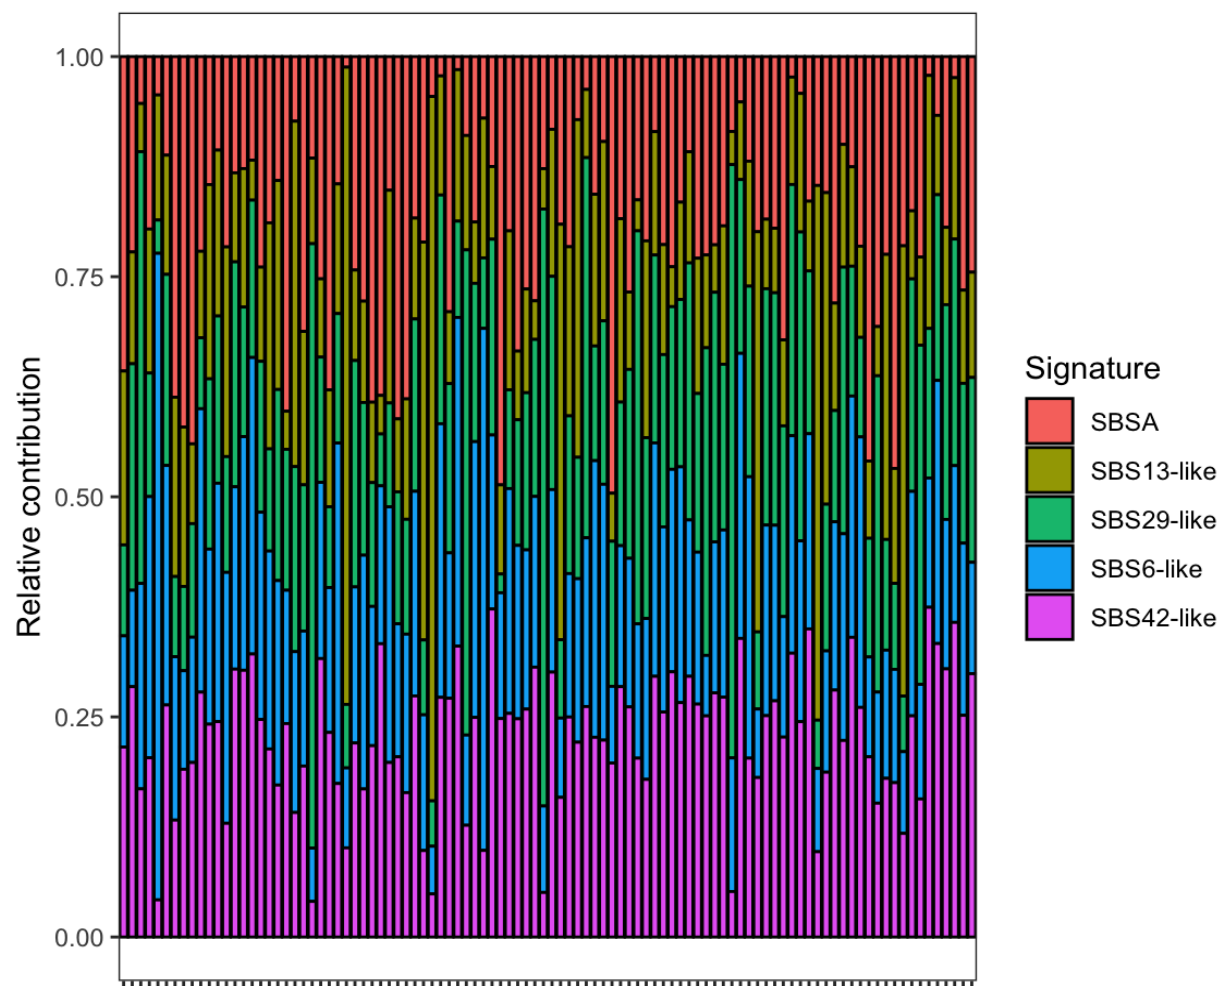

Figure S1. Plot of the relative contribution of extracted *de novo* single-base substitution mutational signatures in each sample.

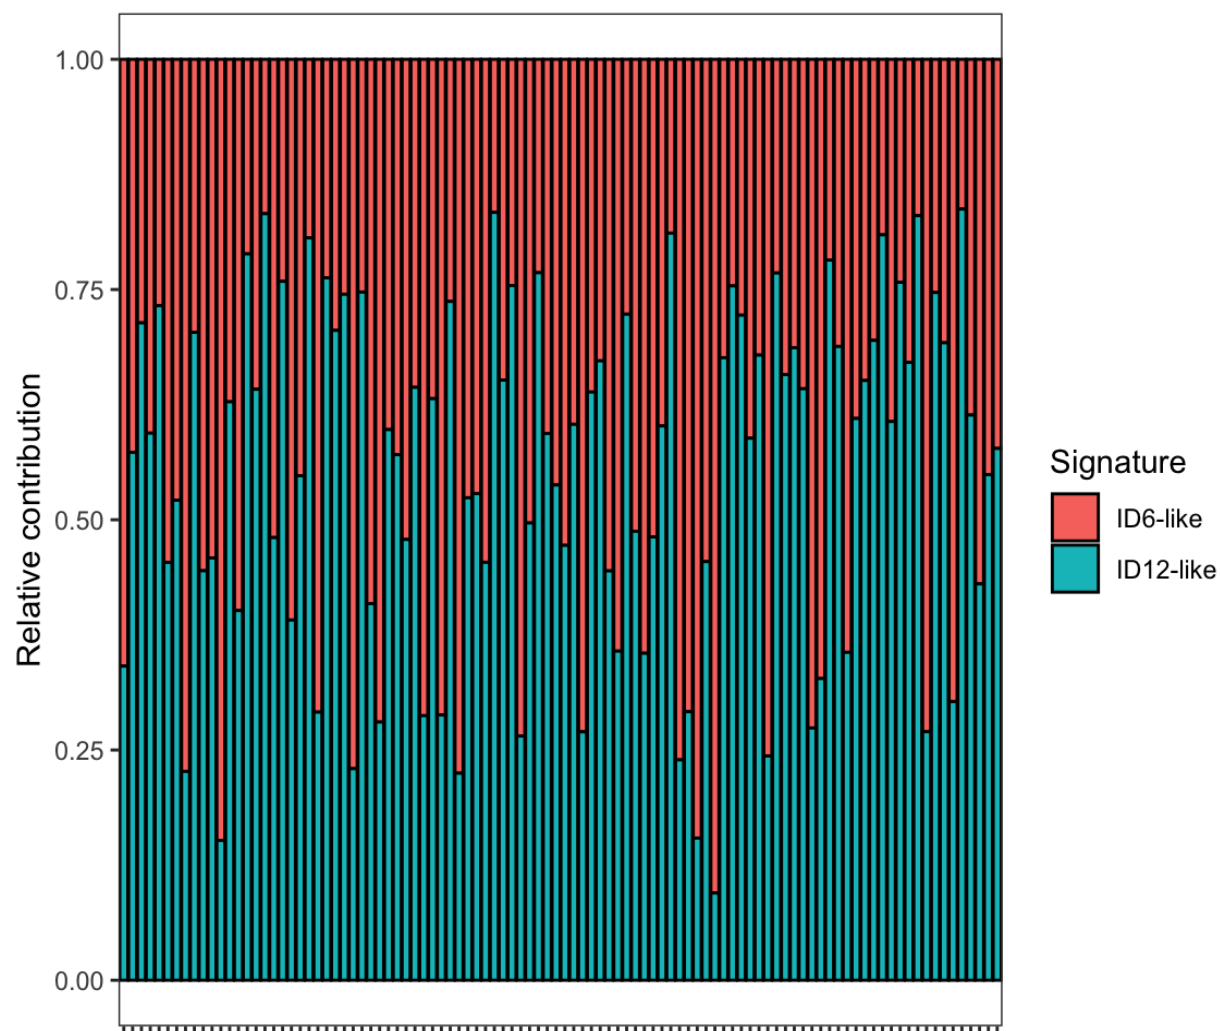

Figure S2. Plot of the relative contribution of extracted *de novo* insertion-deletion mutational signatures in each sample.

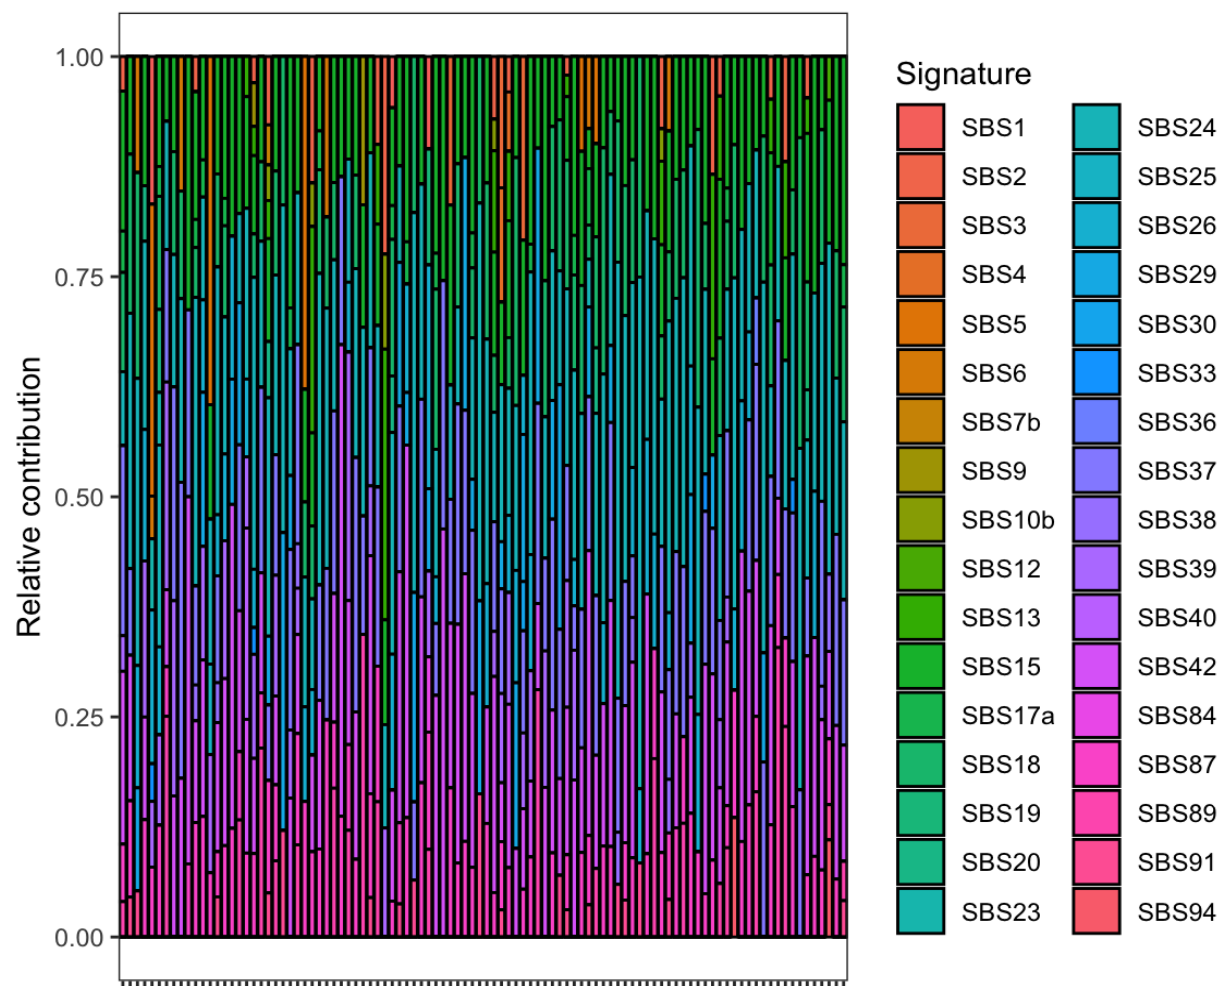

Figure S3. Plot of the relative contribution of fitted COSMIC single-base substitution mutational signatures in each sample.

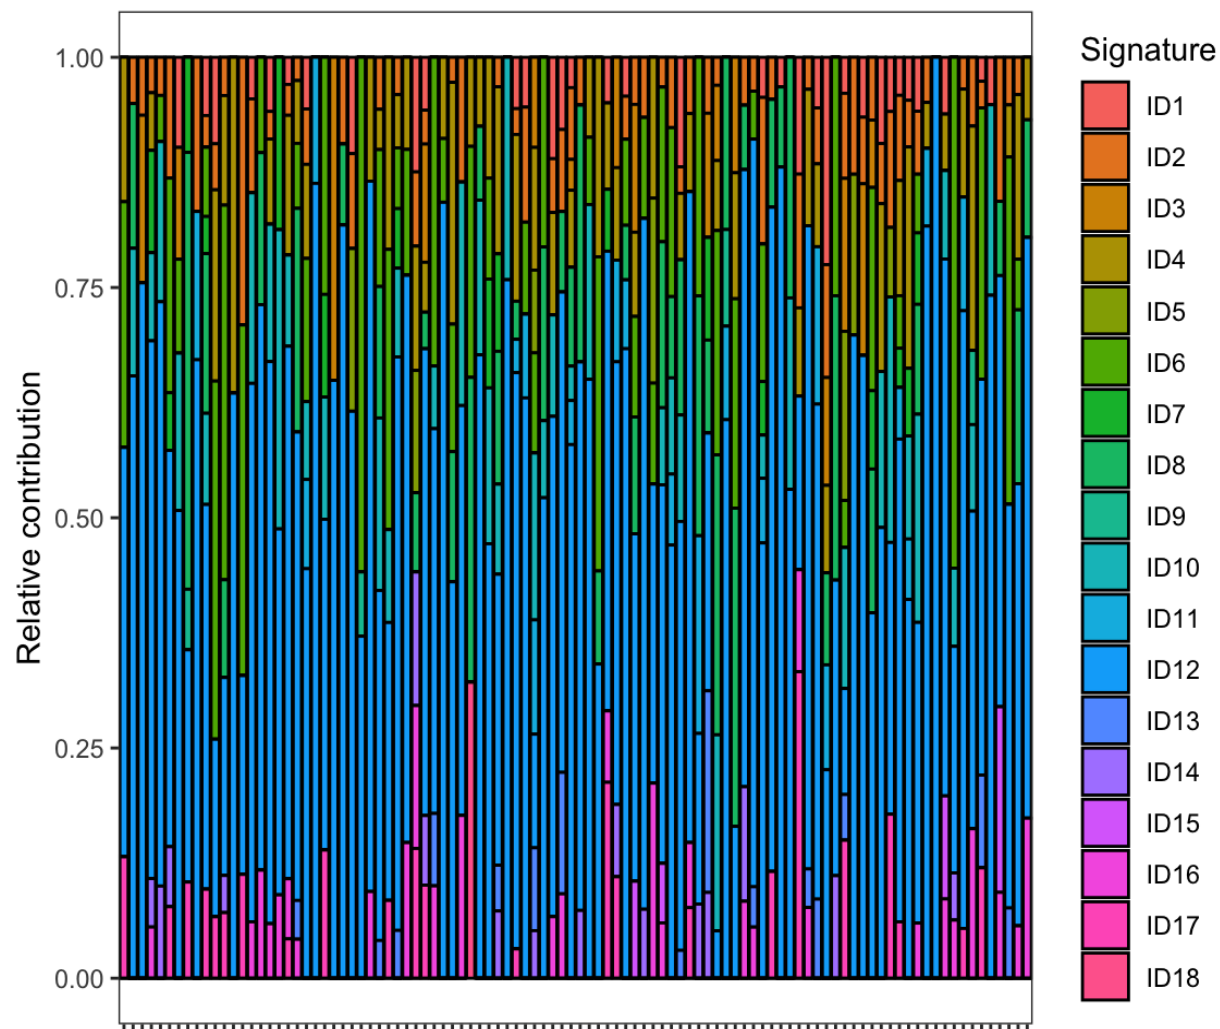

Figure S4. Plot of the relative contribution of fitted COSMIC insertion-deletion mutational signatures in each sample.
